# Supplementary material for: Subnational estimates of factors associated with under-five mortality in Kenya: a spatio-temporal analysis, 1993–2014
Source: PubMed Central journal article supplement (PMC8054106; doi:10.1136/bmjgh-2020-004544), 2021-04-15
Supplement: bmjgh-2020-004544supp002.pdf [file bmjgh-2020-004544supp002.pdf]

## Additional File 2:

Factors associated with child survival including their definition and source of data including household sample surveys or population census.

| Group                  | ID                      | Variable                                                                                                          | Definition                                                                                                                                                                                   | Datasets in reference to Table 1                                                            | Time                                                                 |
|------------------------|-------------------------|-------------------------------------------------------------------------------------------------------------------|----------------------------------------------------------------------------------------------------------------------------------------------------------------------------------------------|---------------------------------------------------------------------------------------------|----------------------------------------------------------------------|
| Environmental factors  | 1                       | Rural residency                                                                                                   | The proportion of households in rural areas                                                                                                                                                  | All census, DHS, WMS, MICS, AIS, KIHBS and MIS                                              | Year of Survey                                                       |
|                        | 2                       | Precipitation                                                                                                     | Annual average precipitation by county between 1990 and 2015                                                                                                                                 | Tropical Rainfall Measuring Mission Multi-Satellite and weather station data.               | -                                                                    |
|                        | 3                       | Enhanced vegetation index (EVI)                                                                                   | A vegetation index at 250 spatial resolution averaged to the county level                                                                                                                    | MODIS -Moderate Resolution Imaging Spectroradiometer-                                       | -                                                                    |
| Maternal Factors       | 4                       | Maternal education                                                                                                | The proportion of mothers (15-49 years) who had less than primary education at the time of the survey                                                                                        | All DHS, MICS, MIS and KIHBS; WMS 1997, AIS 2007; Census 1989, 1999                         | Year of Survey                                                       |
|                        | 5                       | Maternal literacy                                                                                                 | The proportion of mothers (15-49 years) who can read all or parts of a sentence provided at the time of the survey                                                                           | All DHS, MIS and KIHBS; WMS 1997; MICS 2007, 2008, 2011, 2013                               | Year of Survey                                                       |
|                        | 6                       | Female-headed Households                                                                                          | The proportion of households headed by a female at the time of survey                                                                                                                        | All census, DHS, WMS, MICS, AIS and KIHBS                                                   | Year of Survey                                                       |
|                        | 7                       | Short birth spacing                                                                                               | The proportion of children with a preceding or succeeding birth interval <24 months                                                                                                          | All DHS                                                                                     | Previous 5 years                                                     |
|                        | 8                       | Use of modern contraceptives                                                                                      | The proportion of women aged 15 to 49 years using any form of modern contraceptive at the time of the survey                                                                                 | All DHS; MICS 2007, 2008, 2011, 2013; WMS 1994                                              |                                                                      |
| Child factors          | 9                       | High parity                                                                                                       | The proportion of women aged, <30 years with 3 or more children or aged >29 years with 5 or more children                                                                                    | All Census, DHS and MICS; MIS 2015, AIS 2007                                                |                                                                      |
|                        | 10                      | Underweight                                                                                                       | The proportion of children whose weight for age was <=-2 standard deviations at the time of the survey                                                                                       | DHS 1993, 1998, 2003, 2014; MICS 2007, 2011; All WMS; KIHBS 2015.                           | Year of survey                                                       |
|                        | 11                      | Wasted                                                                                                            | The proportion of children whose weight for height was <=-2 standard deviations at the time of the survey                                                                                    | The estimates were computed based on the WHO 2006 reference for a well-nourished population |                                                                      |
|                        | 12                      | Stunted                                                                                                           | The proportion of children whose height for age was <=-2 standard deviations at the time of the survey                                                                                       |                                                                                             |                                                                      |
|                        | 13                      | Breastfed within the first hour of birth                                                                          | The proportion of last born <5 years who were breastfed within the first hour after birth                                                                                                    | DHS 1993, 1998, 2003, 2008, 2014; MICS 2007, 2013; KIBHS 2015                               | Previous 5 years for DHS, WMS and KIHBS<br>Previous 2 years for MICS |
|                        | 14                      | Exclusive breastfeeding                                                                                           | The proportion of lastborn living with the mother and breastfed up to six months at the time of the survey                                                                                   | DHS 1993, 1998, 2003, 2008, 2014; MICS 2007, 2008, 2011, 2013; All KIHBS                    |                                                                      |
| 15                     | Continued breastfeeding | The proportion of children 6-18 months old who were still being breastfed at the time of the survey.              | DHS 1993, 1998, 2003, 2008, 2014; All WMS, MICS and KIHBS                                                                                                                                    |                                                                                             |                                                                      |
| 16                     | Low Birthweight (LBW)   | The proportion of children weighing < 2500g at birth at the time of the survey among those whose weight was taken | DHS 1993, 1998, 2003, 2008, 2014<br>MICS 2000, 2011, 2008, 2013; All WMS                                                                                                                     |                                                                                             |                                                                      |
| Household factors      | 17                      | Poor household                                                                                                    | The proportion of households classified as poor or poorer by wealth index constructed using principal component analysis                                                                     | DHS 1993, 1998, 2003, 2008, 2014; Census 1999, 2009; All MICS, MIS and AIS                  | Year of survey                                                       |
|                        | 18                      | Improved Sanitation                                                                                               | The proportion of households who have access to flush toilet facilities                                                                                                                      | All Census, DHS, WMS, MICS, AIS, KIHBS and MIS                                              |                                                                      |
|                        | 19                      | Access to any form of a toilet                                                                                    | The proportion of households who have access to any form of a toilet facility (improved and intermediate)                                                                                    |                                                                                             |                                                                      |
|                        | 20                      | Improved water                                                                                                    | The proportion of households who have access to piped water for drinking                                                                                                                     |                                                                                             |                                                                      |
| Infections             | 21                      | Access to wells borehole and piped water                                                                          | The proportion of households who have access to either piped (improved water) or boreholes/wells water for drinking (Intermediate)                                                           |                                                                                             |                                                                      |
|                        | 22                      | HIV infection prevalence                                                                                          | The proportion of adults aged 15-49 who were HIV positive during the time of the survey                                                                                                      | [1]                                                                                         | Year of survey                                                       |
|                        | 23                      | Malaria infection prevalence                                                                                      | The proportion of children aged 2-10 years with <i>Plasmodium falciparum</i> parasite in their blood.                                                                                        | [2]                                                                                         | Year of survey                                                       |
| Healthcare Utilization | 24                      | At least one antenatal care visit (ANC1)                                                                          | The proportion of women (15-49) who attended at least one ANC visit by a skilled provider (doctor nurse or midwife) during their last pregnancy in the last three years from the survey time | DHS 1993, 1998, 2003, 2008, 2014; MICS 2007, 2008, 2011, 2013; All AIS and MIS              | Previous 5 years for all surveys<br>except MICS (2 year)             |
|                        | 25                      | At least four antenatal care visits (ANC4)                                                                        | The proportion of women (15-49) who attended four or more ANC visit during their last pregnancy in the last three years from survey time                                                     | DHS 1993, 1998, 2003, 2008, 2014; MICS 2008, 2011, 2013 AIS 2012; MIS 2015                  |                                                                      |

|                               |                              |                                                                                                                                                                              |                                                                                                                                                                                                                  |                                             |                                                     |
|-------------------------------|------------------------------|------------------------------------------------------------------------------------------------------------------------------------------------------------------------------|------------------------------------------------------------------------------------------------------------------------------------------------------------------------------------------------------------------|---------------------------------------------|-----------------------------------------------------|
|                               | 26                           | Skilled birth attendance (SBA)                                                                                                                                               | Proportion of mothers who were attended by a doctor, nurse, midwife or a community health worker during delivery                                                                                                 | All DHS, WMS and MICS; AIS 2012; KIBHS 2015 | Year of survey                                      |
|                               | 27                           | Health facility deliveries (HFD)                                                                                                                                             | Proportion of mothers who delivered at a health facility                                                                                                                                                         | All DHS, WMS; KIBHS and MICS; AIS 2012      |                                                     |
|                               | 28                           | Diarrhoea treatment-seeking                                                                                                                                                  | The proportion of children <5 years who had diarrhoea within the past two weeks before the survey whose treatment was sought from a medical facility                                                             | All DHS; MICS 2007, 2008, 2011,2013         |                                                     |
|                               | 29                           | Fever/cough treatment-seeking                                                                                                                                                | The proportion of children <5 years who had fever/cough within the past two weeks before the survey whose treatment was sought from a health provider                                                            | All DHS and MICS; MIS 2015                  |                                                     |
| Child health interventions    | 30                           | Bacille Calmette–Guérin (BCG)                                                                                                                                                | Proportion of children alive at the time of the survey aged 12-23 months who received BCG vaccine                                                                                                                | All DHS, WMS and MICS; KIHBS 2015.          | Previous 2 years for all surveys (12-24 months old) |
|                               | 31                           | Three diphtheria–tetanus–pertussis vaccinations (DPT3)                                                                                                                       | The proportion of children alive at the time of the survey aged 12-23 months who received up to the third dose of DPT vaccine                                                                                    |                                             |                                                     |
|                               | 32                           | Three doses of Polio (Polio3)                                                                                                                                                | The proportion of children alive at the time of the survey aged 12-23 months who received up to the third dose of Polio vaccine                                                                                  |                                             |                                                     |
|                               | 33                           | Measles                                                                                                                                                                      | Proportion of children alive at the time of the survey aged 12-23 months who received measles vaccine                                                                                                            |                                             |                                                     |
|                               | 34                           | Fully immunized                                                                                                                                                              | The proportion of children aged 12-23 months, alive at the time of the survey who received Polio 3, DPT3, BCG and measles vaccines                                                                               |                                             |                                                     |
|                               | 35                           | Oral rehydration salts (ORS use)                                                                                                                                             | Proportion of children <5 years old who had diarrhoea within the past two weeks before the survey who received ORS treatment                                                                                     | All DHS, MICS and KIHBS                     | Year of survey                                      |
|                               | 36                           | Vitamin A- children                                                                                                                                                          | The proportion of children 6-59 months old who received Vitamin A supplement within six months before the survey                                                                                                 | DHS 2003, 2008, 2014; All MICS              |                                                     |
|                               | 37                           | Insecticide-treated bed nets (ITN) use by children                                                                                                                           | The proportion of children <5 years who slept under an ITN in the previous night before the survey                                                                                                               | DHS 2003, 2008, 2014, KIHBS 2005; All MIS   |                                                     |
| 38                            | Recommended antimalarial use | Proportion of children <5 old who had fever within the past two weeks before the survey who received the recommended antimalarial drugs among those given any drug for fever | DHS 2003, 2008, 2014; All MIS and MICS                                                                                                                                                                           |                                             |                                                     |
| Maternal health interventions | 39                           | Tetanus toxoid injection                                                                                                                                                     | Proportion of women who received the recommended doses (2) of tetanus toxoid injection during their last pregnancy up to three years since data collection.                                                      | DHS 1993, 1998, 2003, 2008, 2014            | Previous 5 years                                    |
|                               | 40                           | Intermittent preventive treatment in pregnancy (IPTp 1)                                                                                                                      | Percentage of women (15-49 years) with live birth, three years preceding a survey who during the last pregnancy received at least one dose of SP/Fansidar                                                        | DHS 2003, 2008, 2014; All MIS               |                                                     |
|                               | 41                           | IPTp 2                                                                                                                                                                       | Percentage of women (15-49 years) with a live birth in three years preceding the survey who, during the last pregnancy, received two doses of SP/Fansidar at least one of which was received during an ANC visit |                                             |                                                     |
|                               | 42                           | Iron supplement                                                                                                                                                              | The proportion of mothers who took iron tablets/syrup during their last pregnancy                                                                                                                                | DHS 2003, 2008, 2014                        |                                                     |
|                               | 43                           | Vitamin A-mothers                                                                                                                                                            | Proportion of mothers who received vitamin A supplement within 2 months after delivery                                                                                                                           |                                             |                                                     |

The determinants with a recall period of five years preceding the survey (See the column for the year of the survey) were limited to three years due to errors and bias associated with a longer recall period [3].

## References

- 1 NACC. Kenya HIV prevalence estimates. 2020. <https://nacc.or.ke/> (accessed 22 Oct 2020).
- 2 Macharia PM, Giorgi E, Noor AM, *et al.* Spatio-temporal analysis of Plasmodium falciparum prevalence to understand the past and chart the future of malaria control in Kenya. *Malar J* 2018;**17**:340. doi:10.1186/s12936-018-2489-9
- 3 Ngandu NK, Manda S, Besada D, *et al.* Does adjusting for recall in trend analysis affect coverage estimates for maternal and child health indicators? An analysis of DHS and MICS survey data. *Glob Health Action* 2016;**9**:32408. doi:10.3402/GHA.V9.32408
