# Supplementary material for: Subnational estimates of factors associated with under-five mortality in Kenya: a spatio-temporal analysis, 1993–2014
Source: PubMed Central journal article supplement (PMC8054106; doi:10.1136/bmjgh-2020-004544), 2021-04-15
Supplement: bmjgh-2020-004544supp004.pdf [file bmjgh-2020-004544supp004.pdf]

**Additional file 4: Validation statistics**

The correlation, mean absolute error (MAE) and root mean square (RMSE) from the cross-validation exercise in the spatio-temporal modelling framework. The blue-coloured cells show high correlation ( $\geq 0.7$ ), grey -moderate correlation ( $\geq 0.5$  but  $< 0.7$ ) and white low correlation ( $\geq 0.4$  but  $< 0.5$ ).

|                               | ID | Factor                               | Correlation | MAE   | RMSE  |
|-------------------------------|----|--------------------------------------|-------------|-------|-------|
| Maternal Factors              | 1  | Less than primary school (maternal)  | 0.95        | 6.32  | 9.05  |
|                               | 2  | Maternal literacy                    | 0.69        | 12.2  | 16.6  |
|                               | 3  | Female household head                | 0.56        | 6.04  | 9.05  |
|                               | 4  | Short Birth interval                 | 0.65        | 5.32  | 7.06  |
|                               | 5  | Modern contraceptives use            | 0.66        | 5.94  | 12.12 |
|                               | 6  | High parity                          | 0.74        | 5.8   | 8.9   |
| Child factors                 | 7  | Underweight                          | 0.72        | 5.51  | 6.90  |
|                               | 8  | Wasted                               | 0.67        | 2.88  | 4.05  |
|                               | 9  | Stunted                              | 0.55        | 6.4   | 8.9   |
|                               | 10 | Breastfed within 1st hour of birth   | 0.70        | 10.41 | 12.63 |
|                               | 11 | Exclusive breastfeeding              | 0.99        | 3.78  | 5.17  |
|                               | 12 | Continued breastfeeding              | 0.87        | 4.02  | 4.91  |
| Household factors             | 13 | Low Birthweight                      | 0.42        | 3.91  | 4.82  |
|                               | 14 | Poor household                       | 0.61        | 14.21 | 20.18 |
|                               | 15 | Improved Sanitation                  | 0.89        | 3.41  | 6.41  |
|                               | 16 | Improved and intermediate sanitation | 0.87        | 7.6   | 12.6  |
|                               | 17 | Improved water                       | 0.85        | 8.88  | 13.27 |
| Healthcare Utilization        | 18 | Improved and intermediate water      | 0.76        | 12.0  | 16.3  |
|                               | 19 | ANC1                                 | 0.64        | 8.46  | 13.76 |
|                               | 20 | ANC4                                 | 0.64        | 8.66  | 11.79 |
|                               | 21 | Skilled birth attendance             | 0.76        | 9.76  | 12.56 |
|                               | 22 | Health facility births               | 0.90        | 7.10  | 10.02 |
|                               | 23 | Diarrhoea treatment-seeking          | 0.61        | 9.48  | 12.39 |
| Child health interventions    | 24 | Fever treatment-seeking              | 0.52        | 12.13 | 15.29 |
|                               | 25 | BCG                                  | 0.65        | 6.60  | 12.11 |
|                               | 26 | DPT3                                 | 0.75        | 6.36  | 8.64  |
|                               | 27 | Polio3                               | 0.82        | 8.88  | 11.13 |
|                               | 28 | Measles                              | 0.66        | 8.76  | 13.12 |
|                               | 29 | Fully immunized                      | 0.64        | 10.29 | 13.61 |
|                               | 30 | ORS use                              | 0.44        | 12.38 | 15.81 |
|                               | 31 | Vitamin A- children                  | 0.89        | 9.80  | 11.54 |
|                               | 32 | Child ITN use                        | 0.82        | 10.81 | 14.42 |
| Maternal health interventions | 33 | recommended antimalarials            | 0.55        | 10.60 | 14.02 |
|                               | 34 | Two doses of tetanus toxoid          | 0.67        | 10.61 | 13.02 |
|                               | 35 | IPTp1                                | 0.62        | 13.29 | 15.88 |
|                               | 36 | IPTp2                                | 0.51        | 10.80 | 16.56 |
|                               | 37 | Iron supplement mothers              | 0.79        | 10.41 | 11.87 |
|                               | 38 | Vitamin A mothers                    | 0.83        | 9.44  | 11.59 |
