# Supplementary material for: Subnational estimates of factors associated with under-five mortality in Kenya: a spatio-temporal analysis, 1993–2014
Source: PubMed Central journal article supplement (PMC8054106; doi:10.1136/bmjgh-2020-004544), 2021-04-15
Supplement: bmjgh-2020-004544supp005.pdf [file bmjgh-2020-004544supp005.pdf]

**Additional file 5: Correlation coefficients**

The correlation coefficients between under five mortality and each of the 43 factors associated with child survival in Kenya. Corresponding p values are presented, brown (not statistically significant) green (statistically significant)

| Theme                         | ID | Factor                               | Correlation | P value  |
|-------------------------------|----|--------------------------------------|-------------|----------|
| Environmental factors         | 1  | Vegetation index                     | 0.15        | < 0.0001 |
|                               | 2  | Precipitation                        | 0.25        | < 0.0001 |
|                               | 3  | Rural residence                      | 0.03        | 0.4032   |
| Maternal Factors              | 4  | Less than primary school (maternal)  | 0.30        | < 0.0001 |
|                               | 5  | Maternal literacy                    | -0.18       | < 0.0001 |
|                               | 6  | Female household head                | 0.09        | 0.0047   |
|                               | 7  | Short Birth interval                 | 0.42        | < 0.0001 |
|                               | 8  | Modern contraceptives use            | -0.31       | 0.0299   |
|                               | 9  | High parity                          | 0.40        | < 0.0001 |
| Child factors                 | 10 | Underweight                          | 0.11        | 0.0005   |
|                               | 11 | Wasted                               | 0.08        | 0.0093   |
|                               | 12 | Stunted                              | 0.25        | < 0.0001 |
|                               | 13 | Breastfed within 1st hour of birth   | -0.60       | < 0.0001 |
|                               | 14 | Exclusive breastfeeding              | 0.1         | 0.0013   |
|                               | 15 | Continued breastfeeding              | -0.1        | 0.009    |
|                               | 16 | Low Birthweight                      | -0.02       | 0.6020   |
| Household factors             | 17 | Poor household                       | 0.32        | < 0.0001 |
|                               | 18 | Improved Sanitation                  | -0.07       | 0.0316   |
|                               | 19 | Improved and intermediate sanitation | -0.19       | < 0.0001 |
|                               | 20 | Improved water                       | -0.27       | < 0.0001 |
|                               | 21 | Improved and intermediate water      | -0.14       | 0.0006   |
| Infections                    | 22 | HIV                                  | 0.40        | < 0.0001 |
|                               | 23 | Malaria                              | 0.65        | < 0.0001 |
| Healthcare Utilization        | 24 | ANC1                                 | -0.20       | < 0.0001 |
|                               | 25 | ANC4                                 | 0.13        | < 0.0001 |
|                               | 26 | Skilled birth attendance             | -0.28       | < 0.0001 |
|                               | 27 | Health facility births               | -0.27       | < 0.0001 |
|                               | 28 | Diarrhoea treatment-seeking          | -0.12       | 0.0001   |
|                               | 29 | Fever treatment-seeking              | -0.40       | < 0.0001 |
| Child health interventions    | 30 | BCG                                  | -0.30       | < 0.0001 |
|                               | 31 | DPT3                                 | -0.28       | < 0.0001 |
|                               | 32 | Polio3                               | -0.21       | < 0.0001 |
|                               | 33 | Measles                              | -0.35       | < 0.0001 |
|                               | 34 | Fully immunized                      | -0.25       | < 0.0001 |
|                               | 35 | ORS use                              | 0.06        | 0.0657   |
|                               | 36 | Vitamin A- children                  | -0.27       | < 0.0001 |
|                               | 37 | Child ITN use                        | -0.18       | < 0.0001 |
|                               | 38 | recommended antimalarials            | 0.48        | < 0.0001 |
| Maternal health interventions | 39 | Two doses of tetanus toxoid          | -0.23       | 0.0074   |
|                               | 40 | IPTp1                                | 0.16        | 0.0001   |
|                               | 41 | IPTp2                                | 0.21        | < 0.0001 |
|                               | 42 | Iron supplement mothers              | -0.16       | < 0.0001 |
|                               | 43 | Vitamin A mothers                    | -0.23       | < 0.0001 |
