# Supplementary material for: Subnational estimates of factors associated with under-five mortality in Kenya: a spatio-temporal analysis, 1993–2014
Source: PubMed Central journal article supplement (PMC8054106; doi:10.1136/bmjgh-2020-004544), 2021-04-15
Supplement: bmjgh-2020-004544supp006.pdf [file bmjgh-2020-004544supp006.pdf]

**Additional file 5: Comparison between estimates generated in the current work and from other sources****Corelation**

Table 1: Corelation coefficients between estimates generated from the current study and estimates from [1–4]

| ID | Determinant              | Source       | Temporal range | Correlation | P value |
|----|--------------------------|--------------|----------------|-------------|---------|
| 1  | Underweight              | [1–3] IHME   | 2000-2014      | 0.8575      | <0.0001 |
| 2  | Wasting                  |              |                | 0.7728      | <0.0001 |
| 3  | Stunting                 |              |                | 0.7475      | <0.0001 |
| 4  | Three doses of DPT       |              |                | 0.8001      | <0.0001 |
| 5  | Improved water           |              |                | 0.7403      | <0.0001 |
| 6  | Skilled birth attendance | [4] Worldpop | 2014           | 0.6547      | <0.0001 |

IHME- institute of Health Measure Evaluation, MAP-Malaria Atlas Project

**Ranking of determinants**

The high coverage or low prevalence counties were the best performing in 2014 based on estimates from the current study and the comparator with blue coded counties simultaneously identified from the two sets of data. Likewise, for the counties lagging behind (Low coverage or high prevalence counties), analogous interpretation applies.

Table 2: Ranking of estimates generated from the current study and other sources (Table 1 above)

| Determinant            | High coverage or low prevalence counties                                                                  |                                                                                                          | Low coverage or high prevalence counties                                                                       |                                                                                                                   | Overall match |
|------------------------|-----------------------------------------------------------------------------------------------------------|----------------------------------------------------------------------------------------------------------|----------------------------------------------------------------------------------------------------------------|-------------------------------------------------------------------------------------------------------------------|---------------|
|                        | Current study                                                                                             | Table 1                                                                                                  | Current study                                                                                                  | Table 1                                                                                                           |               |
| Underweight            | Nairobi<br>Nyeri<br>Kirinyaga<br>Murang'a<br>Siaya<br>Kisumu<br>Vihiga<br>Kiambu<br>Homa Bay<br>Nyandarua | Nairobi<br>Nyeri<br>Kirinyaga<br>Murang'a<br>Siaya<br>Kisumu<br>Vihiga<br>Kiambu<br>Homa Bay<br>Kisii    | West Pokot<br>Turkana<br>Mandera<br>Marsabit<br>Samburu<br>Wajir<br>Baringo<br>Isiolo<br>Tana River<br>Garissa | West Pokot<br>Turkana<br>Mandera<br>Marsabit<br>Samburu<br>Wajir<br>Baringo<br>Isiolo<br>Tana River<br>E-Marakwet | 18/20=90%     |
| Wasting                | Siaya<br>Vihiga<br>Kirinyaga<br>Nyeri<br>Kakamega<br>Kisii<br>Kisumu<br>Nakuru<br>Kajiado<br>Bungoma      | Siaya<br>Vihiga<br>Kirinyaga<br>Nyeri<br>Kakamega<br>Kisii<br>Nyamira<br>Nairobi<br>Murang'a<br>Kiambu   | Turkana<br>Garissa<br>Mandera<br>Samburu<br>Wajir<br>Marsabit<br>West Pokot<br>Isiolo<br>Baringo<br>Tana River | Turkana<br>Garissa<br>Mandera<br>Samburu<br>Wajir<br>Marsabit<br>West Pokot<br>Isiolo<br>Baringo<br>Tana River    | 16/20=80%     |
| Stunting               | Nairobi<br>Nyeri<br>Kirinyaga<br>Garissa<br>Mombasa<br>Murang'a<br>Isiolo<br>Kisumu<br>Vihiga<br>Kajiado  | Nairobi<br>Nyeri<br>Kirinyaga<br>Garissa<br>Mombasa<br>Murang'a<br>Isiolo<br>Siaya<br>Laikipia<br>Kiambu | West Pokot<br>Kilifi<br>Mandera<br>Kitui<br>Kwale<br>Bomet<br>Trans Nzoia<br>E-Marakwet<br>Narok<br>Baringo    | West Pokot<br>Kilifi<br>Mandera<br>Kitui<br>Kwale<br>Bomet<br>Trans Nzoia<br>E-Marakwet<br>Narok<br>Tana River    | 16/20=80%     |
| Improved (piped) water | Nairobi<br>Mombasa<br>Taita Taveta<br>Nyeri<br>Meru<br>Kiambu<br>Kilifi<br>Isiolo<br>Garissa<br>Kajiado   | Nairobi<br>Mombasa<br>Taita Taveta<br>Nyeri<br>Meru<br>Kiambu<br>Kilifi<br>Nakuru<br>Kirinyaga<br>Kwale  | Migori<br>Kisii<br>Nyamira<br>Vihiga<br>Busia<br>Homa Bay<br>Wajir<br>Narok<br>West Pokot<br>Tana River        | Migori<br>Kisii<br>Nyamira<br>Vihiga<br>Busia<br>Homa Bay<br>Trans Nzoia<br>Nandi<br>Kakamega<br>Siaya            | 13/20=65%     |

|                          |                                                                                                               |                                                                                                          |                                                                                                                    |                                                                                                             |           |
|--------------------------|---------------------------------------------------------------------------------------------------------------|----------------------------------------------------------------------------------------------------------|--------------------------------------------------------------------------------------------------------------------|-------------------------------------------------------------------------------------------------------------|-----------|
| Three doses of DPT       | Kirinyaga<br>Kiambu<br>Bomet<br>Embu<br>Machakos<br>Nandi<br>Kericho<br>Makueni<br>Taita Taveta<br>E-Marakwet | Kirinyaga<br>Kiambu<br>Bomet<br>Embu<br>Machakos<br>Nandi<br>Uasin Gishu<br>Nyamira<br>Vihiga<br>Nyeri   | Mandera<br>Wajir<br>West Pokot<br>Garissa<br>Marsabit<br>Migori<br>Turkana<br>Lamu<br>Homa Bay<br>Bungoma          | Mandera<br>Wajir<br>West Pokot<br>Garissa<br>Marsabit<br>Migori<br>Turkana<br>Lamu<br>Kajiado<br>Narok      | 15/20=75% |
| Skilled birth attendance | Nairobi<br>Murang'a<br>Mombasa<br>Kirinyaga<br>Kiambu<br>Embu<br>Tharaka Nithi<br>Meru<br>Nyandarua<br>Nyeri  | Nairobi<br>Murang'a<br>Mombasa<br>Kirinyaga<br>Kiambu<br>Nyamira<br>Kisii<br>Kakamega<br>Busia<br>Vihiga | Wajir<br>Turkana<br>Marsabit<br>Tana River<br>Isiolo<br>Samburu<br>Garissa<br>Mandera<br>West Pokot<br>Trans Nzoia | Wajir<br>Turkana<br>Marsabit<br>Tana River<br>Isiolo<br>Samburu<br>Garissa<br>Lamu<br>Kitui<br>Taita Taveta | 12/20=60% |

#### References

- 1 Kinyoki DK, Osgood-Zimmerman AE, Pickering B V., *et al.* Mapping child growth failure across low- and middle-income countries. *Nature* 2020;**577**:231–4. doi:10.1038/s41586-019-1878-8
- 2 Mosser JF, Gagne-Maynard W, Rao PC, *et al.* Mapping diphtheria-pertussis-tetanus vaccine coverage in Africa, 2000–2016: a spatial and temporal modelling study. *Lancet* 2019;**6736**:1–13. doi:10.1016/S0140-6736(19)30226-0
- 3 Deshpande A, Miller-Petrie MK, Lindstedt PA, *et al.* Mapping geographical inequalities in access to drinking water and sanitation facilities in low-income and middle-income countries, 2000–17. *Lancet Glob Heal* 2020;**8**:e1162–85. doi:10.1016/S2214-109X(20)30278-3
- 4 Ruktanonchai CW, Ruktanonchai NW, Nove A, *et al.* Equality in Maternal and Newborn Health: Modelling Geographic Disparities in Utilisation of Care in Five East African Countries. *PLoS One* 2016;**11**:e0162006.
